# Supplementary material
Source: PubMed Central journal article supplement (PMC6370510)
Supplement: NIHMS1511380-supplement-Supplemental_Publication_Material.pdf [file NIHMS1511380-supplement-Supplemental_Publication_Material.pdf]

## **SUPPLEMENTAL MATERIAL**

**Supplemental Table 1.** Cross-tabulation of Income drops (1900-2005), Income trajectory (1990-2005), and large income changes (1990-2005) with tertiles of income volatility (1990-2005), CARDIA study.

|                                | Tertile of Income Volatility |                |                   |                 |
|--------------------------------|------------------------------|----------------|-------------------|-----------------|
|                                | Overall<br>N=3,977           | Low<br>n=1,325 | Medium<br>n=1,326 | High<br>n=1,326 |
| <b>Number of Income Drops*</b> |                              |                |                   |                 |
| 0                              | 2,356 (59.2%)                | 1,299 (98.0%)  | 783 (59.1%)       | 274 (20.7%)     |
| 1                              | 1,365 (34.3%)                | 18 (1.4%)      | 488 (36.8%)       | 859 (64.8%)     |
| 2+                             | 256 (6.0%)                   | 8 (0.6%)       | 55 (4.2%)         | 193 (14.6%)     |
| <b>Income trajectory*</b>      |                              |                |                   |                 |
| No change/increase             | 2,104 (52.9%)                | 1,203 (90.8%)  | 695 (52.4%)       | 206 (15.5%)     |
| Fluctuation                    | 1,737 (43.7%)                | 85 (6.4%)      | 577 (43.5%)       | 1,075 (81.1%)   |
| Decrease                       | 136 (3.4%)                   | 37 (2.8%)      | 54 (4.1%)         | 45 (3.4%)       |
| <b>Large income changes*</b>   |                              |                |                   |                 |
| None                           | 2,119 (53.3%)                | 1,298 (98%)    | 519 (39.1%)       | 302 (22.8%)     |
| At least one large increase    | 1,227 (30.9%)                | 26 (2.0%)      | 715 (53.9%)       | 486 (36.7%)     |
| Large fluctuation              | 422 (10.6%)                  | 0 (0.0%)       | 19 (1.4%)         | 403 (30.4%)     |
| At least one large decrease    | 209 (5.3%)                   | 1 (0.1%)       | 73 (5.5%)         | 302 (22.8%)     |

Abbreviations: CARDIA: Coronary Artery Risk Development in Young Adults

\*Chi square p value < 0.01

**Supplemental Table 2.** Multivariable adjusted (for cumulative time-varying covariates) Cox proportional hazards models of income volatility and number of income drops (1990-2005) with incident cardiovascular disease events and all-cause mortality (2005-2015), CARDIA study.

|                               | Cardiovascular Disease             |                                    |                                    |                                    | All-Cause Mortality                |                                    |                                    |                                    |
|-------------------------------|------------------------------------|------------------------------------|------------------------------------|------------------------------------|------------------------------------|------------------------------------|------------------------------------|------------------------------------|
|                               | Model 1<br>HR<br>(95% CI)          | Model 2<br>HR<br>(95% CI)          | Model 3<br>HR<br>(95% CI)          | Model 4<br>HR<br>(95% CI)          | Model 1<br>HR<br>(95% CI)          | Model 2<br>HR<br>(95% CI)          | Model 3<br>HR<br>(95% CI)          | Model 4<br>HR<br>(95% CI)          |
| Tertiles of Income Volatility |                                    |                                    |                                    |                                    |                                    |                                    |                                    |                                    |
| Low                           | Ref                                |
| Medium                        | 1.32<br>(0.76, 2.30)               | 1.26<br>(0.70, 2.26)               | 1.26<br>(0.70, 2.26)               | 1.29<br>(0.72, 2.33)               | <b>1.70</b><br><b>(1.10, 2.64)</b> | <b>1.63</b><br><b>(1.03, 2.56)</b> | 1.54<br>(0.97, 2.43)               | 1.57<br>(0.98, 2.51)               |
| High                          | <b>2.57</b><br><b>(1.57, 4.22)</b> | <b>2.21</b><br><b>(1.23, 3.94)</b> | <b>1.97</b><br><b>(1.11, 3.52)</b> | <b>2.09</b><br><b>(1.13, 3.86)</b> | <b>2.49</b><br><b>(1.65, 3.76)</b> | <b>2.19</b><br><b>(1.37, 3.50)</b> | <b>1.73</b><br><b>(1.08, 2.77)</b> | 1.64<br>(1.00, 2.71)               |
| Number of Income Drops        |                                    |                                    |                                    |                                    |                                    |                                    |                                    |                                    |
| 0                             | Ref                                |
| 1                             | <b>1.89</b><br><b>(1.25, 2.84)</b> | <b>1.63</b><br><b>(1.03, 2.56)</b> | 1.47<br>(0.93, 2.33)               | 1.49<br>(0.93, 2.38)               | 1.34<br>(0.96, 1.87)               | 1.18<br>(0.82, 1.68)               | 1.00<br>(0.70, 1.43)               | 0.99<br>(0.69, 1.43)               |
| 2+                            | <b>3.35</b><br><b>(1.87, 6.03)</b> | <b>2.93</b><br><b>(1.56, 5.49)</b> | <b>2.82</b><br><b>(1.49, 5.36)</b> | <b>2.94</b><br><b>(1.52, 5.70)</b> | <b>2.90</b><br><b>(1.83, 4.57)</b> | <b>2.32</b><br><b>(1.43, 3.77)</b> | <b>1.85</b><br><b>(1.13, 3.03)</b> | <b>1.68</b><br><b>(1.02, 2.77)</b> |

Abbreviations: CARDIA: Coronary Artery Risk Development in Young Adults; HR: Hazards ratio.

Boldface indicates statistical significance,  $p < 0.05$

Model 1 is unadjusted; model 2 is adjusted for 1990 age, sex, race, less than a high school education, study site, cumulative: marital status, insurance status, and number of individuals in the household; model 3 is additionally adjusted for cumulative: BMI, systolic blood pressure, total cholesterol, fasting glucose, smoking, alcohol use, physical activity, and elevated depressive symptoms; model 4 is additionally adjusted for cumulative: income and unemployment status.

**Supplemental Table 3.** Multivariable adjusted Cox proportional hazards models of Income trajectory (1990-2005) and Large income changes (1990-2005) with incident cardiovascular disease events and all-cause mortality (2005-2015), CARDIA study.

|                             | Cardiovascular Disease               |                                      |                                      |                                      | All-Cause Mortality                  |                                      |                                      |                                      |
|-----------------------------|--------------------------------------|--------------------------------------|--------------------------------------|--------------------------------------|--------------------------------------|--------------------------------------|--------------------------------------|--------------------------------------|
|                             | Model 1<br>HR<br>(95% CI)            | Model 2<br>HR<br>(95% CI)            | Model 3<br>HR<br>(95% CI)            | Model 4<br>HR<br>(95% CI)            | Model 1<br>HR<br>(95% CI)            | Model 2<br>HR<br>(95% CI)            | Model 3<br>HR<br>(95% CI)            | Model 4<br>HR<br>(95% CI)            |
| <b>Income trajectory</b>    |                                      |                                      |                                      |                                      |                                      |                                      |                                      |                                      |
| No change/increase          | Ref                                  |
| Fluctuation                 | <b>2.03</b><br>( <b>1.36, 3.02</b> ) | <b>1.78</b><br>( <b>1.13, 2.81</b> ) | <b>1.73</b><br>( <b>1.08, 2.76</b> ) | <b>1.71</b><br>( <b>1.06, 2.74</b> ) | <b>1.39</b><br>( <b>1.01, 1.90</b> ) | 1.21<br>(0.84, 1.75)                 | 1.07<br>(0.73, 1.57)                 | 1.02<br>(0.69, 1.50)                 |
| Decrease                    | 1.23<br>(0.38, 3.99)                 | 0.97<br>(0.23, 4.10)                 | 0.95<br>(0.22, 4.07)                 | 0.97<br>(0.22, 4.19)                 | 1.75<br>(0.84, 3.62)                 | 1.36<br>(0.58, 3.20)                 | 1.40<br>(0.59, 3.33)                 | 1.62<br>(0.67, 3.94)                 |
| <b>Large income changes</b> |                                      |                                      |                                      |                                      |                                      |                                      |                                      |                                      |
| None                        | Ref                                  |
| At least one large increase | 1.19<br>(0.77, 1.84)                 | 1.50<br>(0.90, 2.48)                 | 1.48<br>(0.88, 2.49)                 | 1.38<br>(0.81, 2.37)                 | 0.70<br>(0.48, 1.02)                 | 0.87<br>(0.57, 1.34)                 | 0.96<br>(0.61, 1.49)                 | 0.79<br>(0.50, 1.25)                 |
| Large fluctuation           | 1.23<br>(0.65, 2.31)                 | 1.22<br>(0.56, 2.67)                 | 1.03<br>(0.45, 2.36)                 | 0.98<br>(0.42, 2.26)                 | 0.86<br>(0.51, 1.46)                 | 1.13<br>(0.63, 2.02)                 | 1.11<br>(0.61, 2.02)                 | 1.15<br>(0.63, 2.09)                 |
| At least one large decrease | <b>2.32</b><br>( <b>1.21, 4.45</b> ) | <b>3.08</b><br>( <b>1.55, 6.10</b> ) | <b>3.37</b><br>( <b>1.68, 6.76</b> ) | <b>3.74</b><br>( <b>1.83, 7.67</b> ) | <b>1.88</b><br>( <b>1.12, 3.15</b> ) | <b>1.88</b><br>( <b>1.04, 3.41</b> ) | <b>1.96</b><br>( <b>1.05, 3.68</b> ) | <b>2.47</b><br>( <b>1.30, 4.69</b> ) |

Abbreviations: CARDIA: Coronary Artery Risk Development in Young Adults; HR: Hazard ratio

Boldface indicates statistical significance,  $p < 0.05$

Model 1 is unadjusted; model 2 is adjusted for 1990 age, sex, race, less than a high school education, marital status, number of people in the household, 1992 health insurance status, and study site; model 3 is additionally adjusted for 1990 BMI, systolic blood pressure, total cholesterol, smoking, alcohol use, physical activity, elevated depressive symptoms, and 1992 fasting glucose; model 4 is additionally adjusted for 1990 income and unemployment status.
